# Supplementary material
Source: PubMed Central journal article supplement (PMC4434722)
Supplement: pnas.201418965SI.pdf [file pnas.201418965SI.pdf]

# Supporting Information

Astley et al. 10.1073/pnas.1418965112

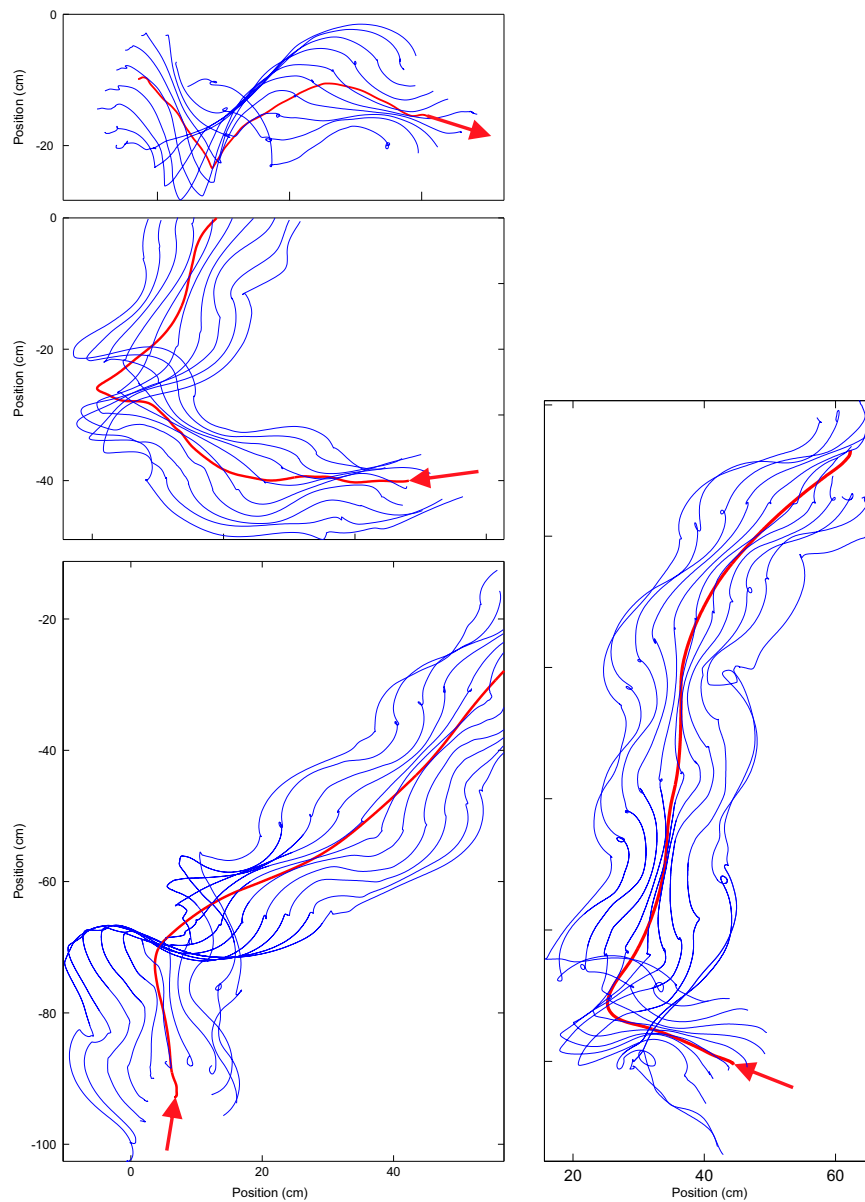

**Fig. S1.** Sample movement sequences containing both reversal and differential turns. Red lines indicate the path of the center of mass and blue lines indicate the path of points along the body, as in Fig. 2 of the main text.



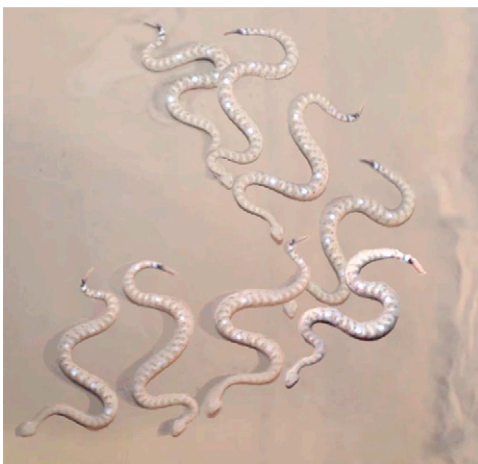

**Movie S2.** A sidewinder rattlesnake performing a reversal turn.

[Movie S2](#)

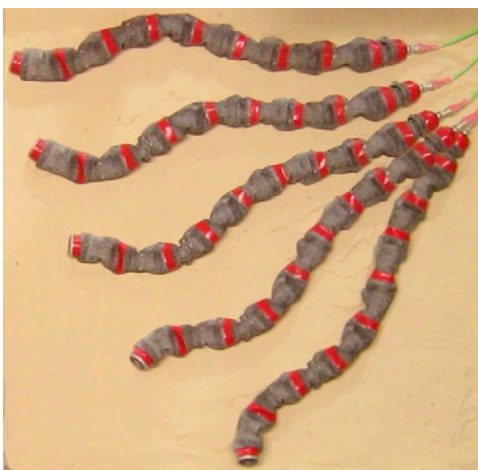

**Movie S3.** The snake robot performing differential turning in a sand bed due to an amplitude gradient in the horizontal wave.

[Movie S3](#)

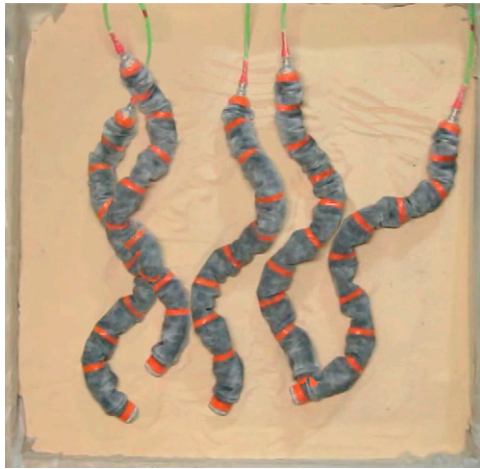

**Movie S4.** The snake robot performing reversal turning in a sand bed due to a  $180^\circ$  phase shift in the vertical wave.

[Movie S4](#)

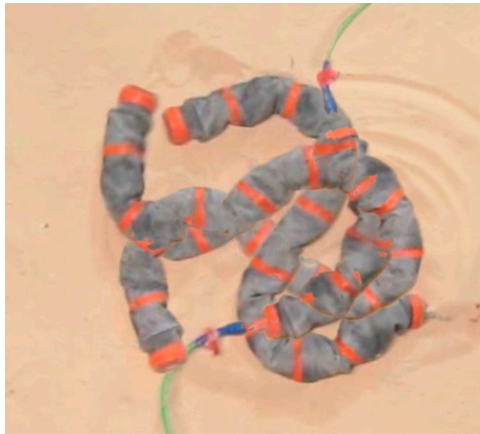

**Movie S5.** The snake robot performing frequency turning in a sand bed due to a 0.6 ratio in spatial frequency of the vertical and horizontal waves.

[Movie S5](#)

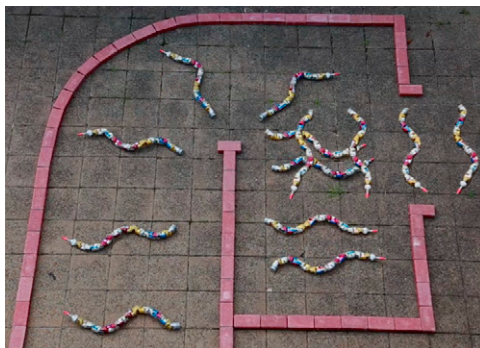

**Movie S6.** The snake robot (at 3x speed) navigating a trackway using the three turn types described in this paper.

[Movie S6](#)

**Dataset S1. Paired  $t$  tests results between waveform and locomotion variables before and after reversals**

[Dataset S1](#)

**Dataset S2. Statistical tests of waveform and locomotion variables between individuals**

[Dataset S2](#)

Repeated-measures ANOVAs use turn type as a fixed, crossed factor and individual as a random, crossed factor. Means are reported in the test notes unless they are given in the main text.

**Dataset S3. Statistical test of robot vs. snake turn magnitude**

[Dataset S3](#)

Turn type and robot versus biological are both fixed, crossed factors.

**Dataset S4. Lengths, masses, and number of sequences of each type for each individual**

[Dataset S4](#)

**Dataset S5. Regression results for waveform and locomotion variables against turn angle within turn types**

[Dataset S5](#)
